# Supplementary material for: Highly ordered TiO2nanostructures by sequential vapour infiltration of block copolymer micellar films in an atomic layer deposition reactor
Source: Royal Society of Chemistry journal article supplement (doi:10.1039/c2tc00306f), 2012-11-09
Supplement: c2tc00306f.pdf [file c2tc00306f.pdf]

*Electronic supplementary information*  
*for*

**Highly ordered TiO<sub>2</sub> nanostructures by sequential vapour infiltration of block  
copolymer micellar films in an atomic layer deposition reactor†**

Jun Yin, Qiang Xu, Zhaogen Wang, Xueping Yao, and Yong Wang\*

State Key Laboratory of Materials-Oriented Chemical Engineering, College of  
Chemistry and Chemical Engineering, Nanjing University of Technology, Nanjing  
210009, Jiangsu (P. R. China)

\*Fax: 0086-25-8317 2292

Email: yongwang@njut.edu.cn

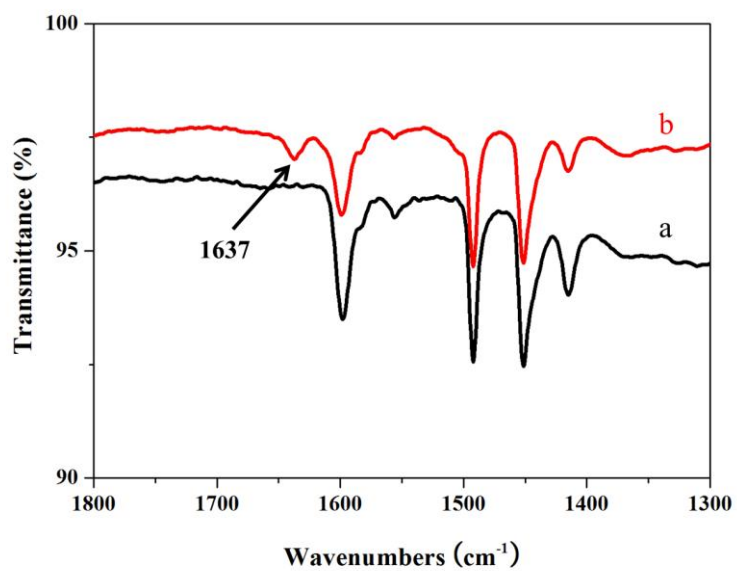

**Figure S1.** FTIR spectra of PS<sub>23k</sub>-*b*-P4VP<sub>4.5k</sub> films before (a) and after (b) exposure of TiCl<sub>4</sub> vapour in the ALD reactor.
